# Supplementary material for: Targeted Nanocarriers Co-Opting Pulmonary Intravascular Leukocytes for Drug Delivery to the Injured Brain
Source: PubMed Central journal article supplement — ACS Nano. 2023 Jul 11;17(14):13121–36. doi: 10.1021/acsnano.2c08275 (PMC10373654; doi:10.1021/acsnano.2c08275), 2023-07-11
Supplement: nn2c08275_si_001.pdf [file nn2c08275_si_001.pdf]

## Supporting Information

### Targeted nanocarriers co-opting pulmonary intravascular leukocytes for drug delivery to the injured brain

Jia Nong<sup>1,†</sup>, Patrick M. Glassman<sup>1,2,†</sup>, Jacob W. Myerson<sup>1</sup>, Viviana Zuluaga-Ramirez<sup>3</sup>, Alba Rodriguez-Garcia<sup>4,5</sup>, Alvin Mukalel<sup>6</sup>, Serena Omo-Lamai<sup>7</sup>, Landis R. Walsh<sup>1</sup>, Marco E. Zamora<sup>1,8</sup>, Xijing Gong<sup>1,7</sup>, Zhicheng Wang<sup>1</sup>, Kartik Bhamidipati<sup>1</sup>, Raisa Y. Kiseleva<sup>1</sup>, Carlos H. Villa<sup>1</sup>, Colin Fred Greineder<sup>1</sup>, Scott E. Kasner<sup>9</sup>, Drew Weissman<sup>10</sup>, Michael J. Mitchell<sup>6,11,12,13,14</sup>, Silvia Muro<sup>15,16,17</sup>, Yuri Persidsky<sup>3,18</sup>, Jacob Samuel Brenner<sup>1,7</sup>, Vladimir R. Muzykantov<sup>1,\*</sup>, Oscar A. Marcos-Contreras<sup>1,8,†,\*</sup>

<sup>1</sup>Department of Systems Pharmacology and Translational Therapeutics, Perelman School of Medicine, University of Pennsylvania, Philadelphia, PA, 19104, USA

<sup>2</sup>Department of Pharmaceutical Sciences, Temple University School of Pharmacy, Philadelphia, PA, 19140, USA

<sup>3</sup>Department of Pathology and Laboratory Medicine, Lewis Katz School of Medicine, Temple University, Philadelphia, PA, 19140, USA

<sup>4</sup>Department of Pathology and Laboratory Medicine, Ovarian Cancer Research Center, Perelman School of Medicine, University of Pennsylvania, Philadelphia, PA, 19104, USA

<sup>5</sup>Center for Cellular Immunotherapies, Abramson Cancer Center, Perelman School of Medicine, University of Pennsylvania, Philadelphia, PA, 19104, USA

<sup>6</sup>Department of Bioengineering, University of Pennsylvania, Philadelphia, PA, 19104, USA

<sup>7</sup>Division of Pulmonary Allergy, and Critical Care, Department of Medicine, Perelman School of Medicine, University of Pennsylvania, Philadelphia, PA, 19104, USA

<sup>8</sup>School of Biomedical Engineering, Science, and Health Systems, Drexel University, Philadelphia, PA, 19104, USA

<sup>9</sup>Department of Neurology, Perelman School of Medicine, University of Pennsylvania, Philadelphia, PA, 19104, USA

<sup>10</sup>Division of Infectious Diseases, Perelman School of Medicine, University of Pennsylvania, Philadelphia, PA 19104, USA

<sup>11</sup>Abramson Cancer Center, Perelman School of Medicine, University of Pennsylvania, Philadelphia, PA, 19104, USA

<sup>12</sup>Institute for Immunology, Perelman School of Medicine, University of Pennsylvania, Philadelphia, PA, 19104, USA

<sup>13</sup>Cardiovascular Institute, Perelman School of Medicine, University of Pennsylvania, Philadelphia, PA, 19104, USA

<sup>14</sup>Institute for Regenerative Medicine, Perelman School of Medicine, University of Pennsylvania, Philadelphia, PA, 19104, USA

<sup>15</sup>Institute for Bioengineering of Catalonia (IBEC), Barcelona, 08028, Spain

<sup>16</sup>Institute of Catalonia for Research and Advanced Studies (ICREA), Barcelona, 08010, Spain

<sup>17</sup>Institute for Bioscience and Biotechnology (IBBR), College Park, MD, 20850, USA

<sup>18</sup>Center for Substance Abuse Research, Lewis Katz School of Medicine, Temple University, Philadelphia, PA, 19140, USA

\* Denotes corresponding author; Email: [oscarmar@penntmedicine.upenn.edu](mailto:oscarmar@penntmedicine.upenn.edu) or [muzykant@penntmedicine.upenn.edu](mailto:muzykant@penntmedicine.upenn.edu)

† Denotes equal contribution

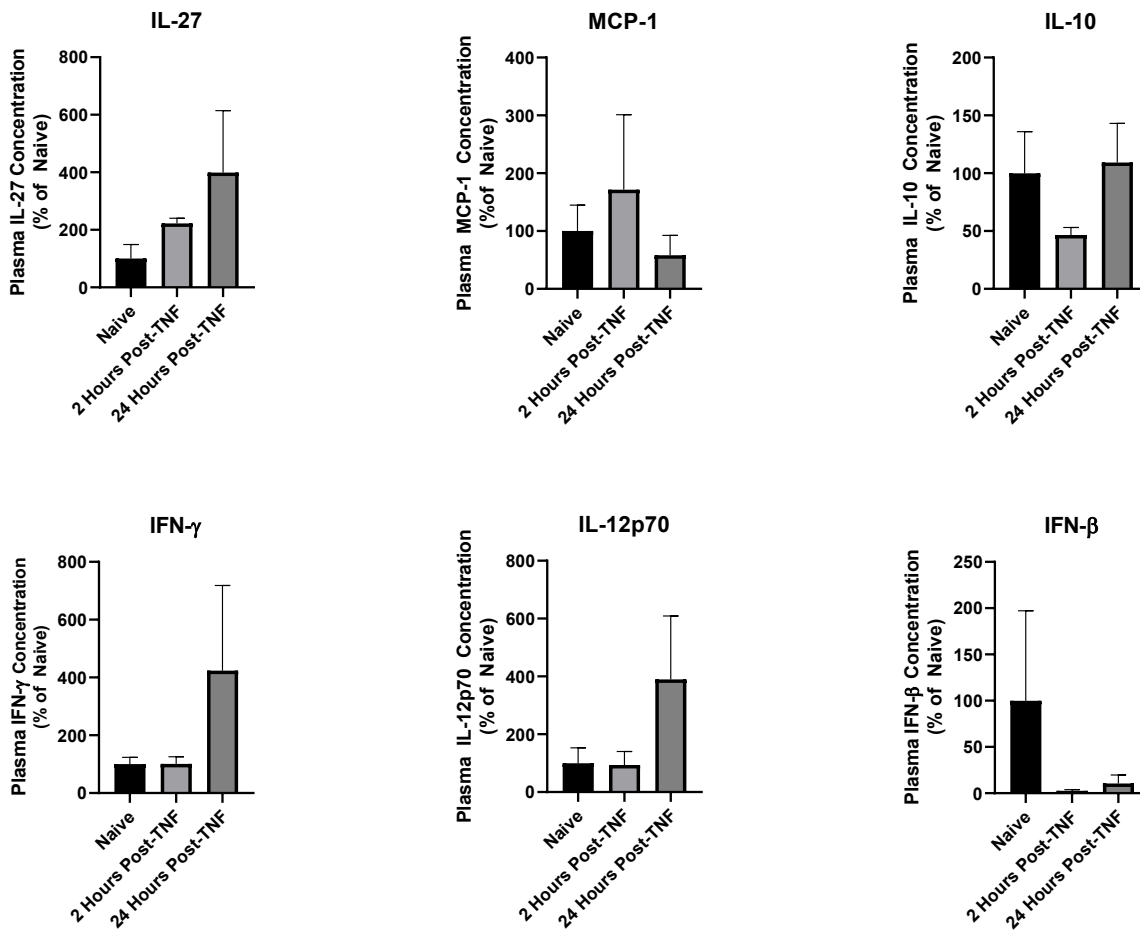

**Supplemental Figure 1.** Kinetics of plasma cytokine concentrations following TNF- $\alpha$  injury as measured by multiplex assay. Abbreviations: IL-27: Interleukin-27; MCP-1: Monocyte Chemoattractant Protein-1; IL-10: Interleukin-10; IFN- $\gamma$ : Interferon-gamma; IL-12p70: Interleukin-12p70; IFN- $\beta$ : Interferon-beta. N=3 mice/group.

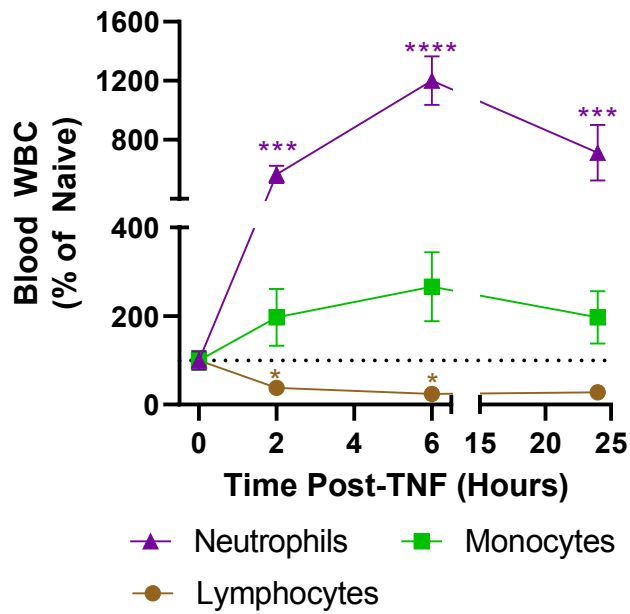

**Supplemental Figure 2.** Dynamics of white blood cells as measured by complete blood counts following TNF- $\alpha$  injury. Counts were normalized to pre-injury values for each individual animal. N=3/group. Comparisons were made via 1-way ANOVA with Dunnett's post-hoc test vs. naïve.

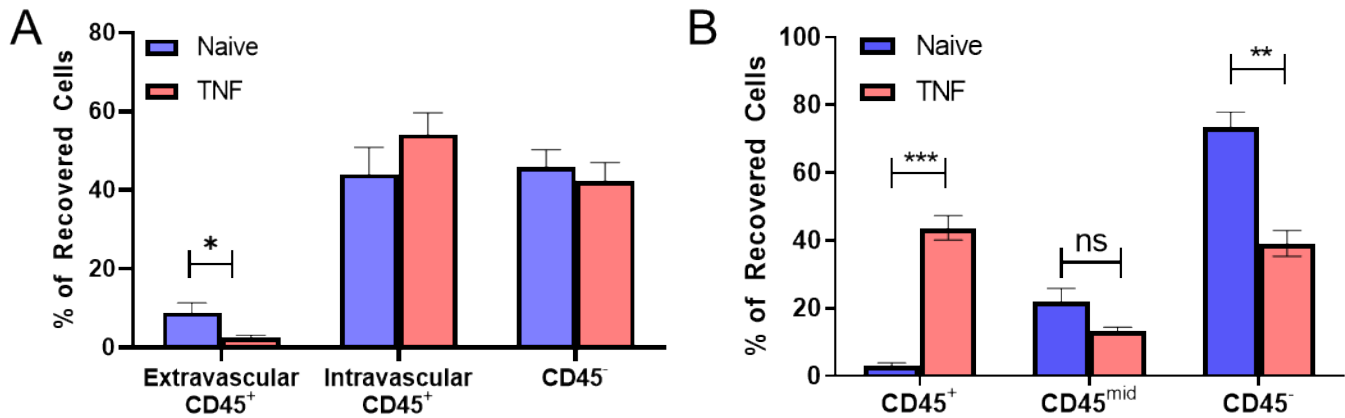

**Supplemental Figure 3.** Relative abundance of leukocytes in A) lungs 2 hours post-TNF- $\alpha$  injection and B) brain 24 hours post-TNF- $\alpha$  injection as measured by flow cytometry of single cell homogenates. N=3-4 mice/group. Comparisons made by unpaired t-test.

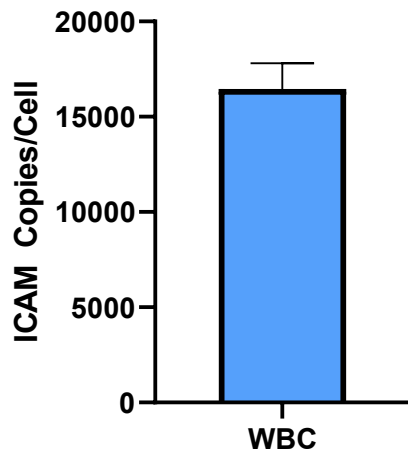

**Supplemental Figure 4.** Surface expression of ICAM on peripheral blood leukocytes extracted from mice. Expression was measured by determining the saturation level of  $\alpha$ ICAM mAb on cells in a radioimmunoassay.

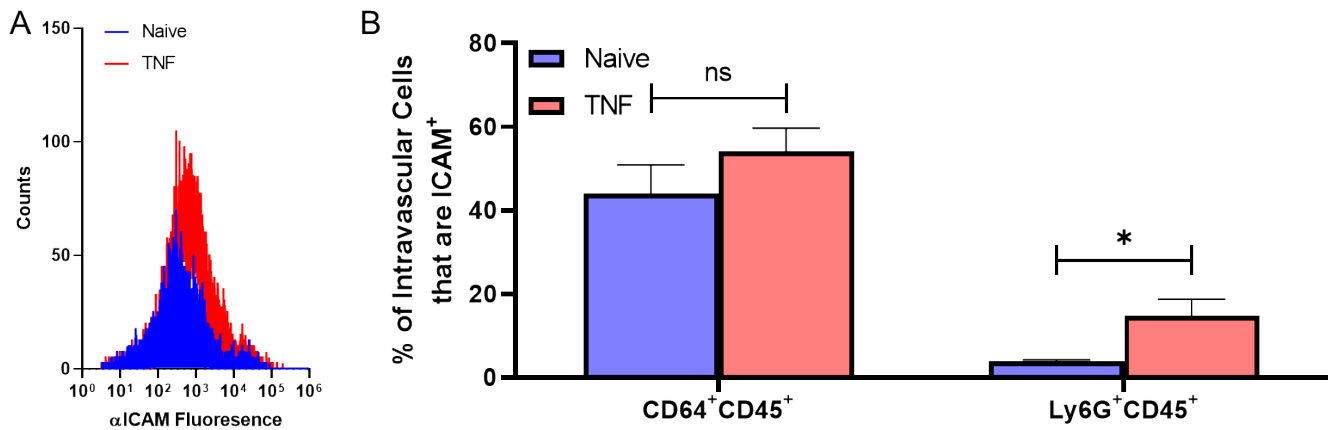

**Supplemental Figure 5.** Flow cytometry of lungs 2 hours after TNF- $\alpha$  injection. A) Histogram analysis of ICAM expression on CD45<sup>+</sup> cells showed a significant increase in the number of ICAM<sup>+</sup>CD45<sup>+</sup> cells after injury. B) Subtyping of leukocytes demonstrated high levels of ICAM-expressing monocyte/macrophages (CD64<sup>+</sup>CD45<sup>+</sup>) and neutrophils (Ly6G<sup>+</sup>CD45<sup>+</sup>). N=3 mice/group. Comparisons made by unpaired t-test.

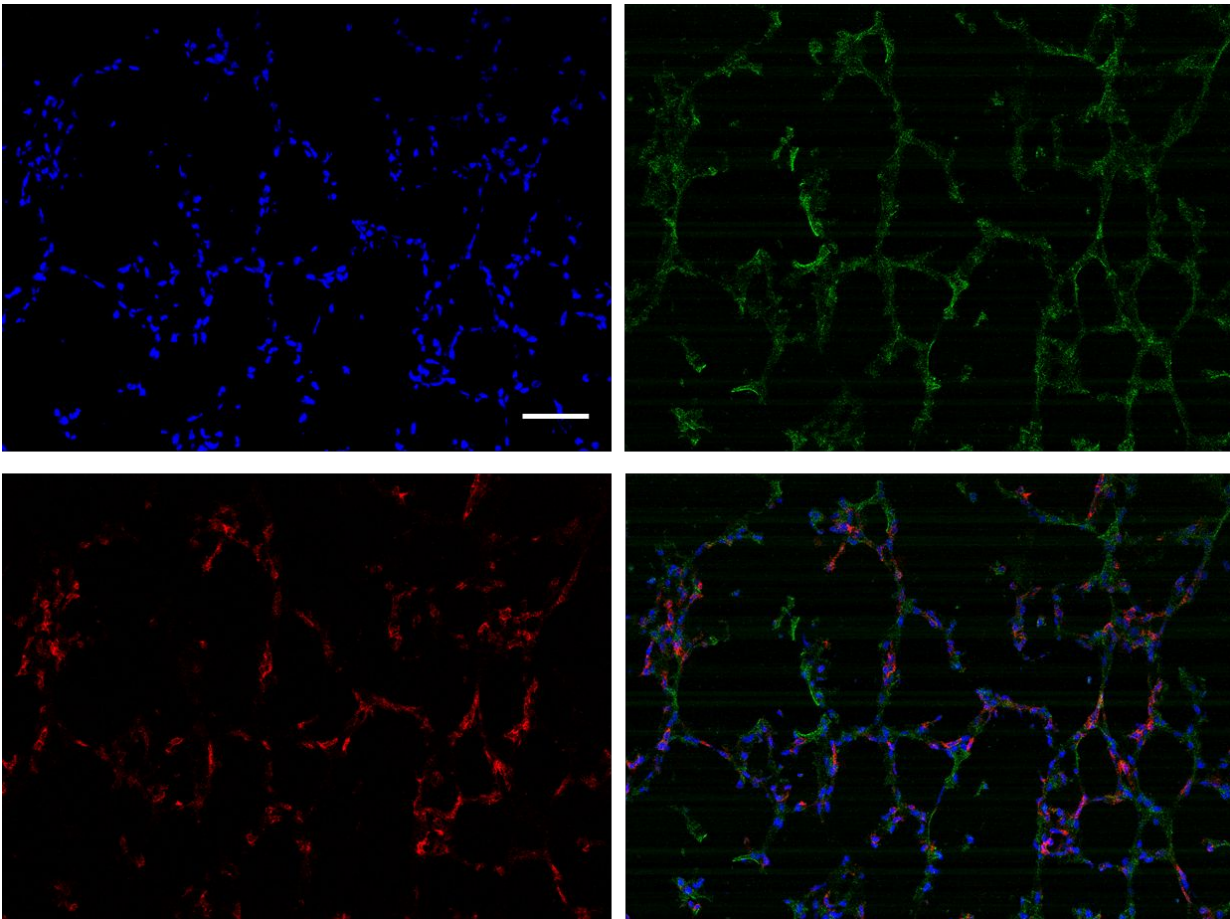

**Supplemental Figure 6.** Histological analysis of mouse lungs 2 hours after TNF- $\alpha$  injection into the brain. Blue: DAPI (nucleus); Green: Tissue autofluorescence (anatomical structure); Red: Leukocytes (CD45).

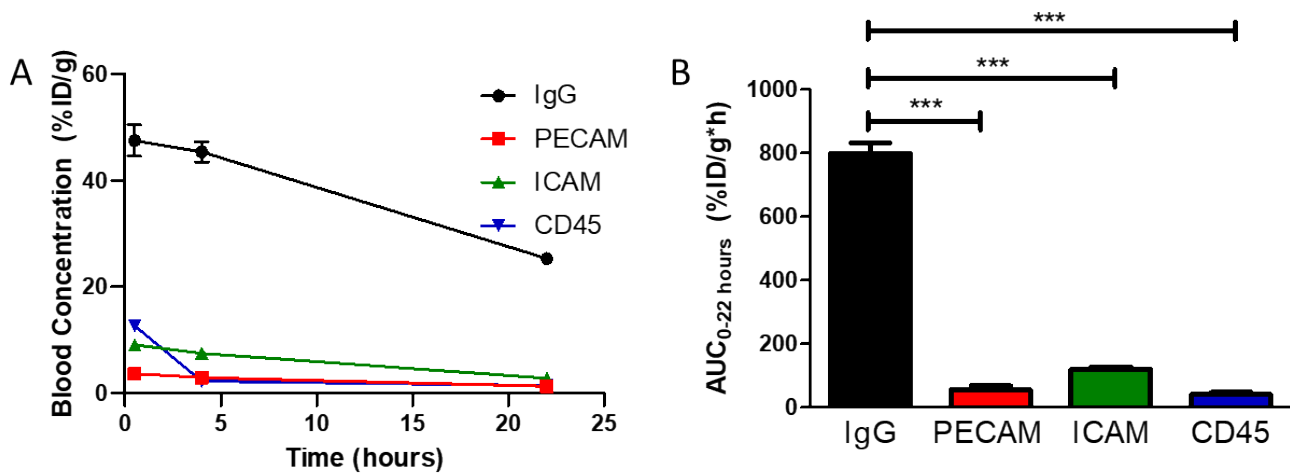

**Supplemental Figure 7.** Blood pharmacokinetics of mAbs against distinct vascular accessible epitopes following IV injection 2 hours post-TNF- $\alpha$  injury. A) Blood concentration vs. time data. B) Area under the concentration vs. time curve from 0 – 22 hours (AUC<sub>0-22 h</sub>). Data represented as mean  $\pm$  SEM. \*\*\* denotes  $p < 0.001$  by 1-way ANOVA with Dunnett's post-hoc test. N = 3 mice/group.

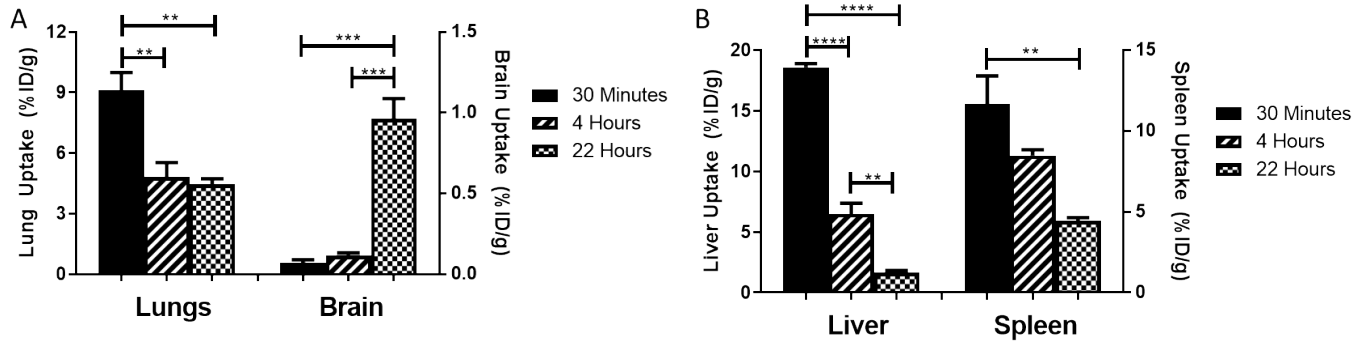

**Supplemental Figure 8.** Organ pharmacokinetics of control IgG injected 2 hours post-TNF- $\alpha$  injury. Experimental timeline as in Figure 2b. A) Lung and brain pharmacokinetics, B) Pharmacokinetics in clearance organs (liver and spleen). Comparisons made by 1-way ANOVA with Tukey's post-hoc test. Data represented as mean  $\pm$  SEM. N = 3 mice/group.

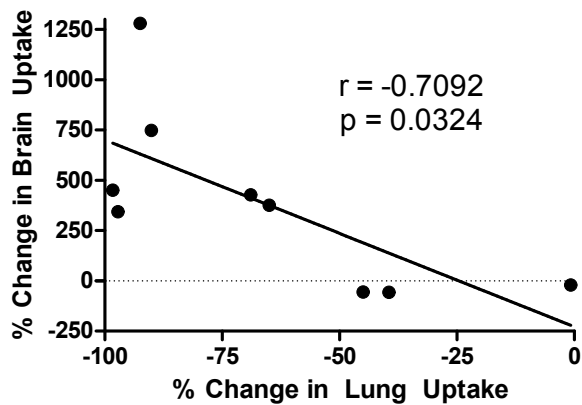

**Supplemental Figure 9.** Changes in brain uptake correlate with clearance from the lung. Data from Figure 2 displayed as individual animals. Pearson's correlation analysis was used to derive the correlation coefficient (r).

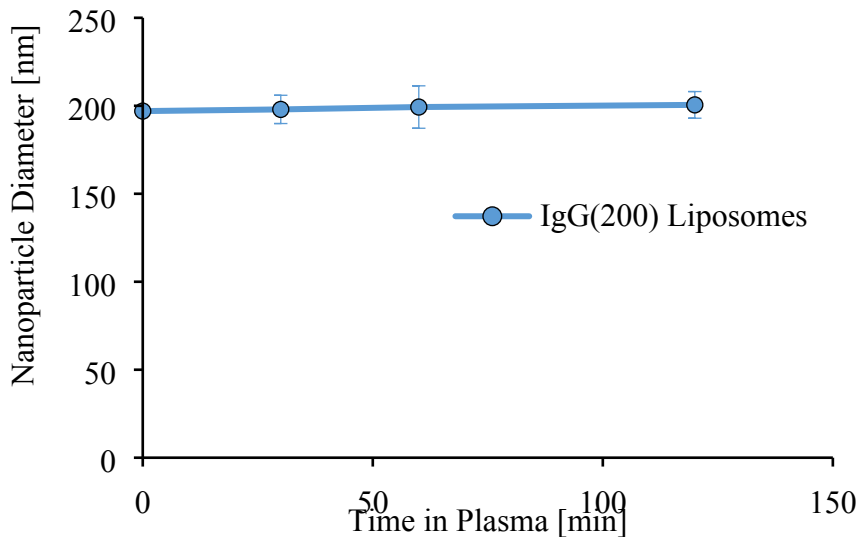

**Supplemental Figure 10.** Stability of IgG-coated liposomes (200 IgG molecules per liposomes, same coating density as ICAM liposomes) in mouse plasma as measured by nanoparticle tracking analysis.

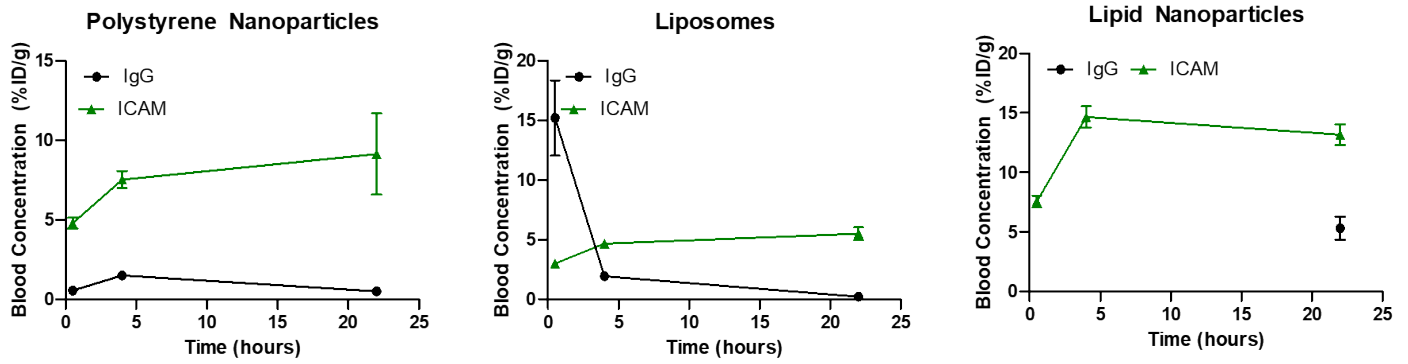

**Supplemental Figure 11.** Blood pharmacokinetics of nanoparticles injected intravenously 2 hours post-TNF- $\alpha$  injury. N=3 mice/group.

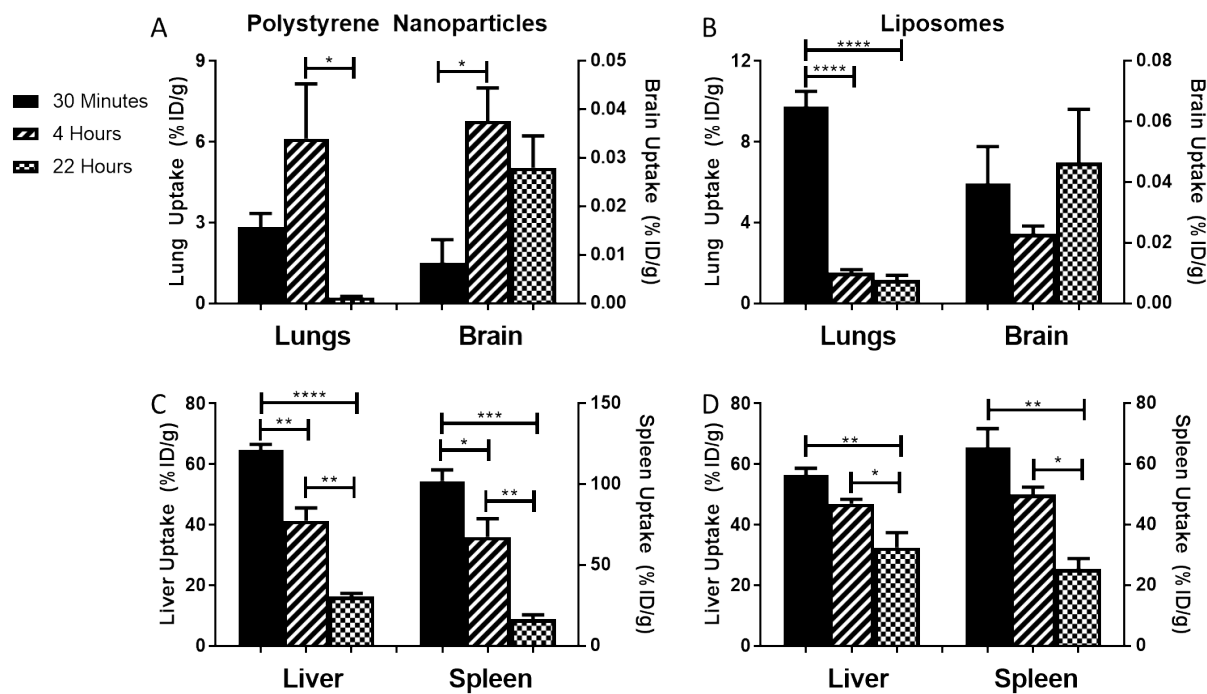

**Supplemental Figure 12.** Pharmacokinetics of control IgG-coated nanoparticles injected 2 hours post-TNF- $\alpha$  injury. Experimental timeline as in Figure 3a. Pharmacokinetics in lungs and brain for A) polystyrene nanoparticles and B) liposomes. Pharmacokinetics in clearance organs for C) polystyrene nanoparticles and D) liposomes. Comparisons made by 1-way ANOVA with Tukey's post-hoc test. Data represented as mean  $\pm$  SEM. N = 3 mice/group.

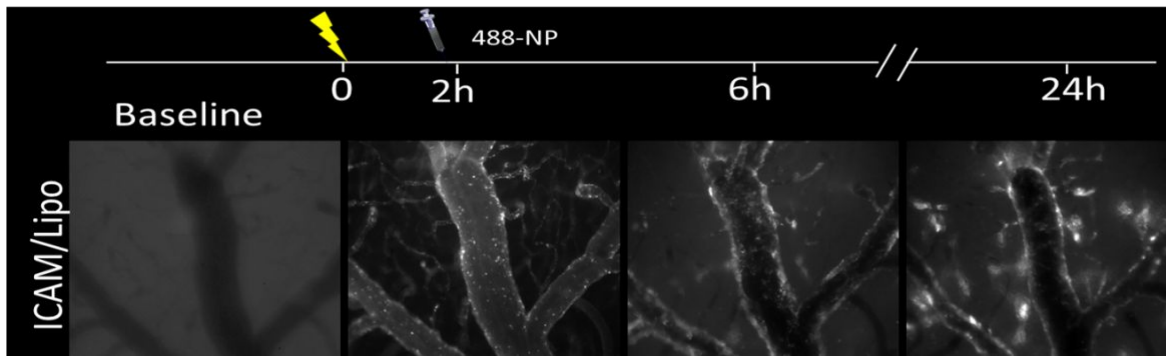

**Supplemental Figure 13.** Cranial window intravital microscopy of ICAM-targeted liposomes in the brain at designated time points after TNF- $\alpha$  injury.

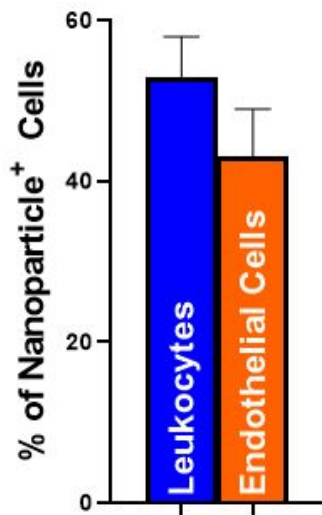

**Supplemental Figure 14.** Cellular specificity of ICAM-targeted polystyrene beads 30 minutes after intravenous injection in the lungs of naïve mice. Data represents the percentage of total nanoparticle-positive cells that are the given cell type. N=3 mice/group.

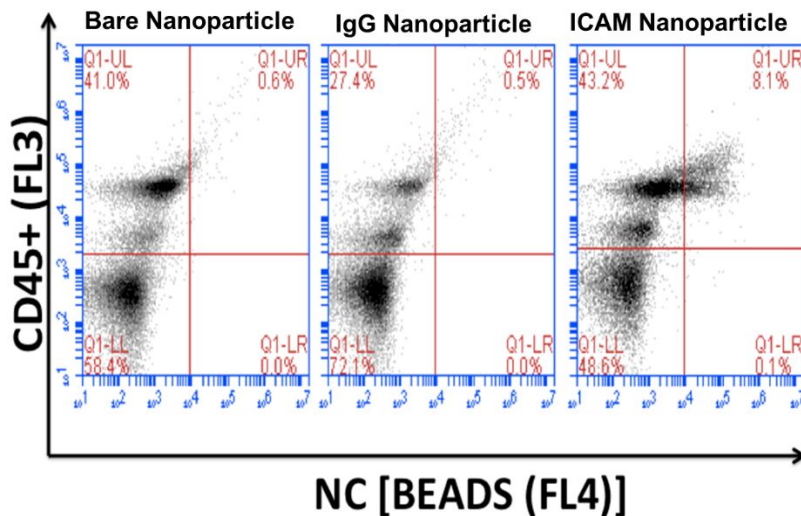

**Supplemental Figure 15.** Representative flow cytometry dot-plots of polystyrene bead (bare, IgG, ICAM) cellular uptake in the brain 22 hours post-injection (24 hours post-TNF).



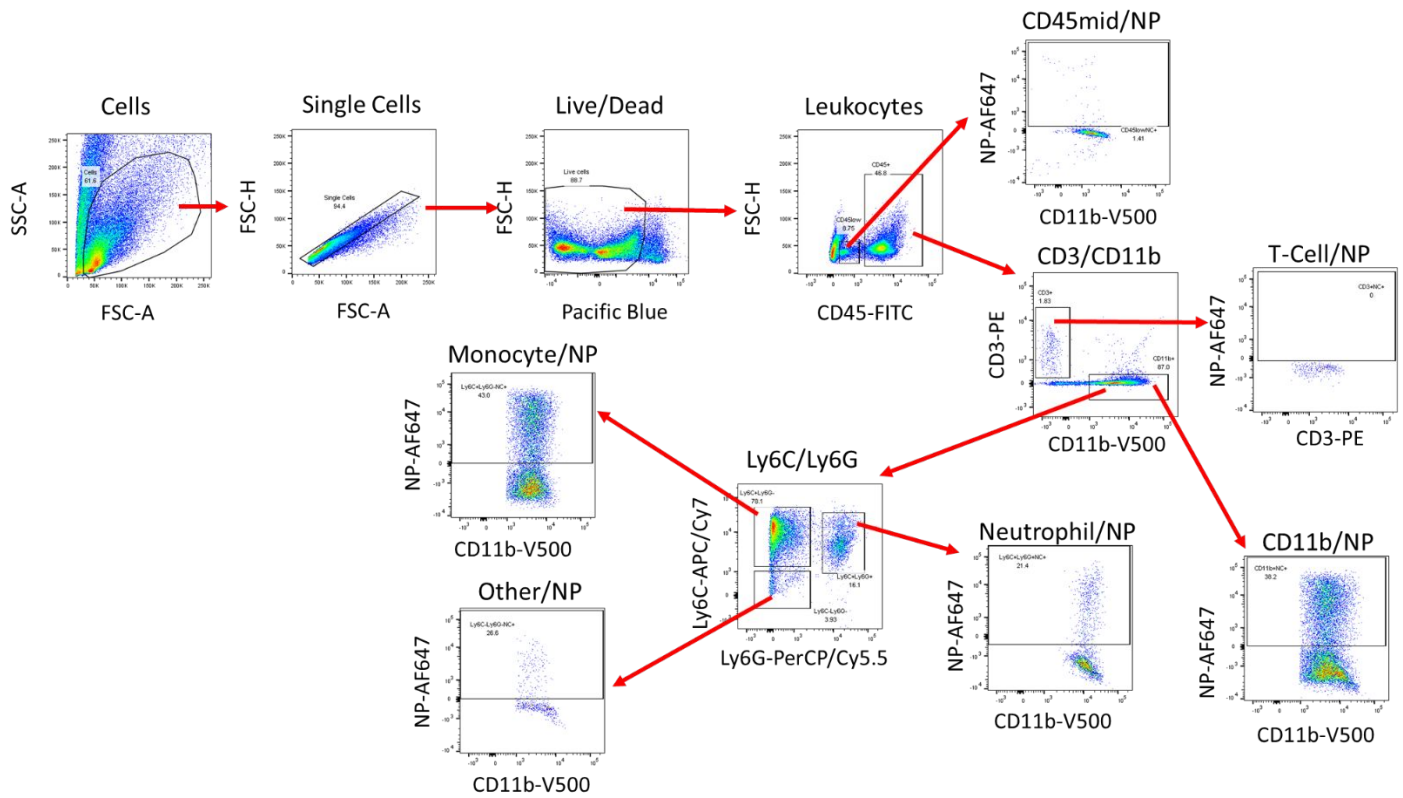

**Supplemental Figure 16.** Gating scheme for detailed flow cytometry of leukocyte sub-types in brain single cell suspensions.

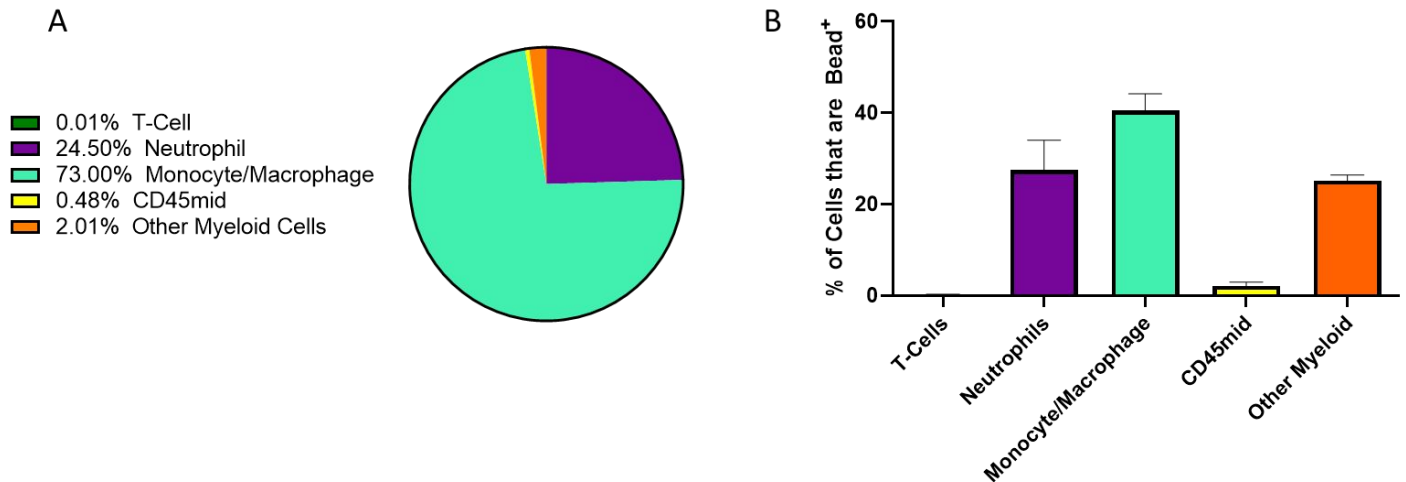

**Supplemental Figure 17.** Flow cytometry of ICAM-targeted polystyrene nanoparticle distribution in leukocytes in the brain 22 hours post-injection (24 hours post-TNF). A) Fraction of nanoparticle-positive leukocytes for each sub-type. B) Fraction of recovered cells that were nanoparticle<sup>+</sup>. T-Cell: CD45<sup>+</sup>CD11b<sup>+</sup>CD3<sup>+</sup>, Neutrophil: CD45<sup>+</sup>CD11b<sup>+</sup>Ly6G<sup>+</sup>, Monocyte: CD45<sup>+</sup>CD11b<sup>+</sup>Ly6C<sup>+</sup>Ly6G<sup>-</sup>, Microglia: CD45<sup>mid</sup>, Other Myeloid: CD45<sup>+</sup>CD11b<sup>+</sup>Ly6C<sup>-</sup>Ly6G<sup>-</sup>. Data represented as mean  $\pm$  SEM. N = 3 mice/group

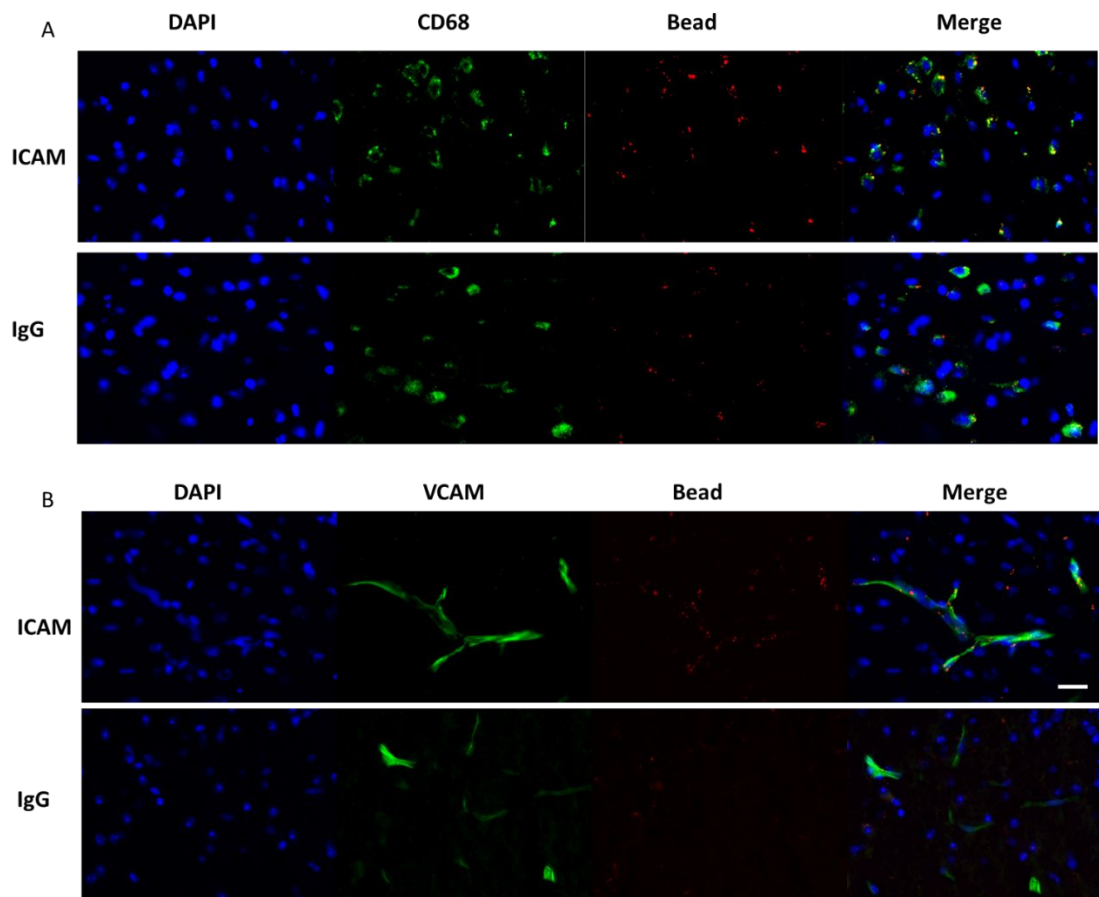

**Supplemental Figure 18.** Histology of brain slices taken 22 hours post-injection of ICAM-targeted or IgG polystyrene nanoparticles (24 hours post TNF- $\alpha$  injection). Staining was performed to determine co-localization with A) monocytes/macrophages (CD68) and B) endothelial cells (VCAM). Scale bar: 50  $\mu$ m.

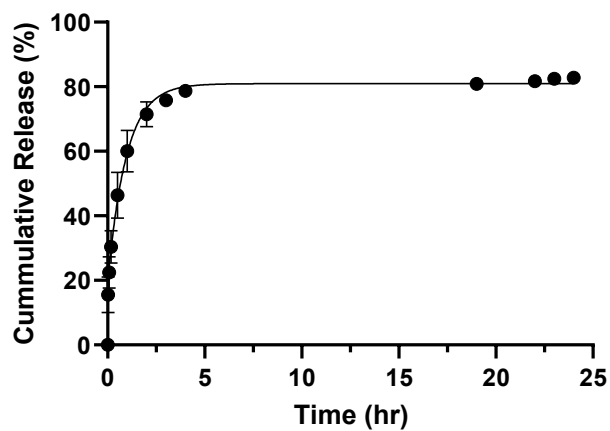

**Supplemental Figure 19.** Dexamethasone release from liposomes incubated in PBS at 37°C.

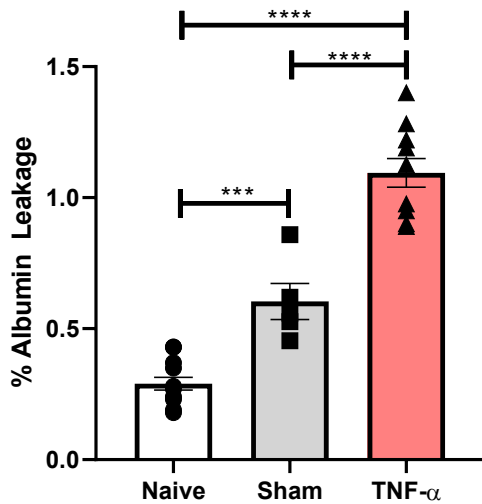

**Supplemental Figure 20.** TNF- $\alpha$  injury induces albumin leak into the brain. 20 hours after injection of TNF- $\alpha$  mice were IV injected with radiolabeled albumin. Following perfusion, the degree of albumin leak was calculated as the percentage of brain albumin concentrations vs. blood. Data represented as mean  $\pm$  SEM. Comparisons made by 1-way ANOVA with Tukey's post-hoc test. N = 5-12 mice/group.

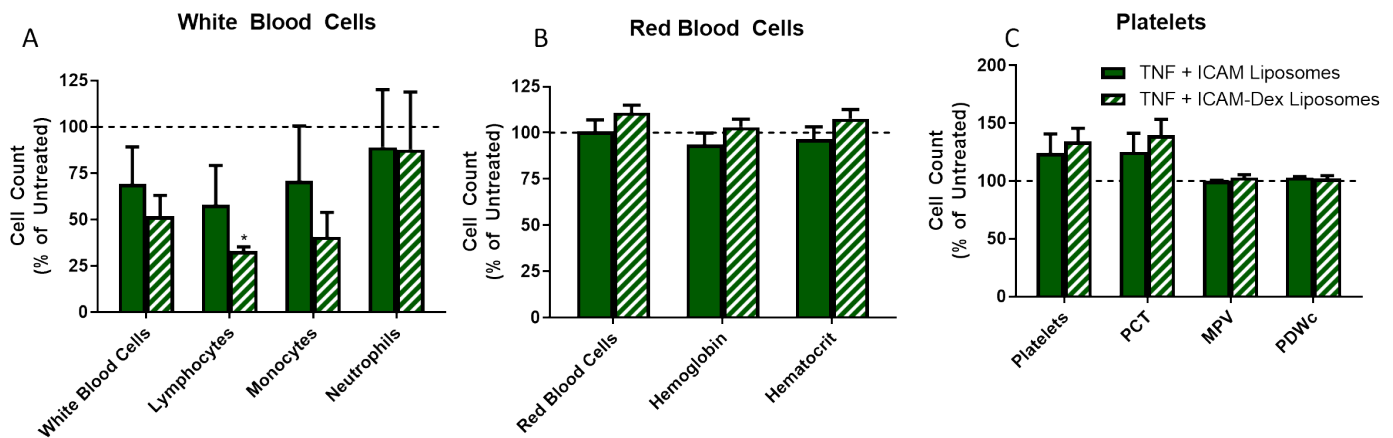

**Supplemental Figure 21.** Complete blood counts 22 hours post-injection of ICAM-targeted liposomes and dexamethasone-loaded ICAM-targeted liposomes (24 hours post-TNF- $\alpha$ ). A) White blood cells, B) Red blood cells, C) Platelets. Data represented as mean  $\pm$  SEM. Dashed line represents values for untreated mice. Comparisons made by 1-way ANOVA with Dunnett's post-hoc test vs. untreated. N  $\geq$  3 mice/group.

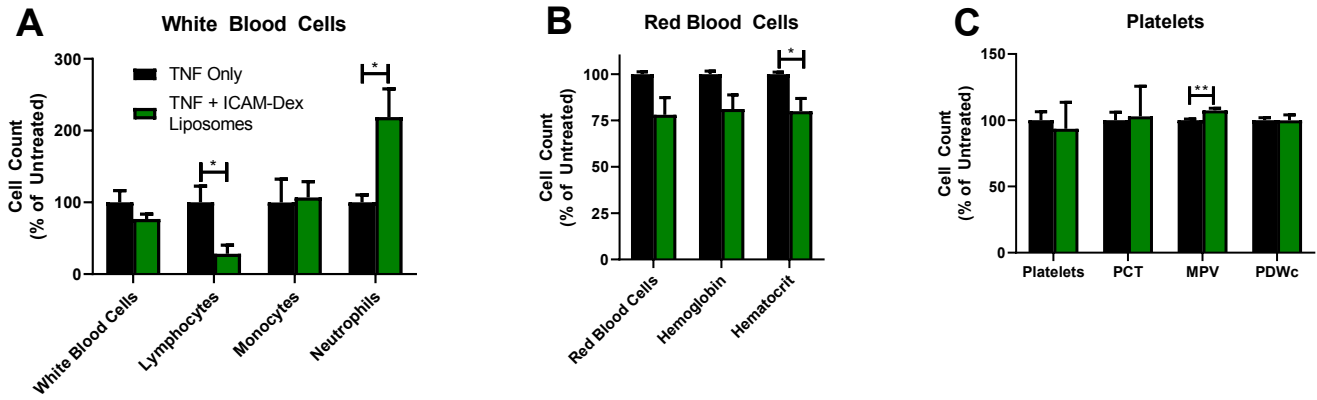

**Supplemental Figure 22.** Complete blood counts 30 minutes post-injection of dexamethasone-loaded ICAM-targeted liposomes (2.5 hours post-TNF- $\alpha$ ). A) White blood cells, B) Red blood cells, C) Platelets. Data represented as mean  $\pm$  SEM. Comparisons made by unpaired t-test. N = 4 mice/group.

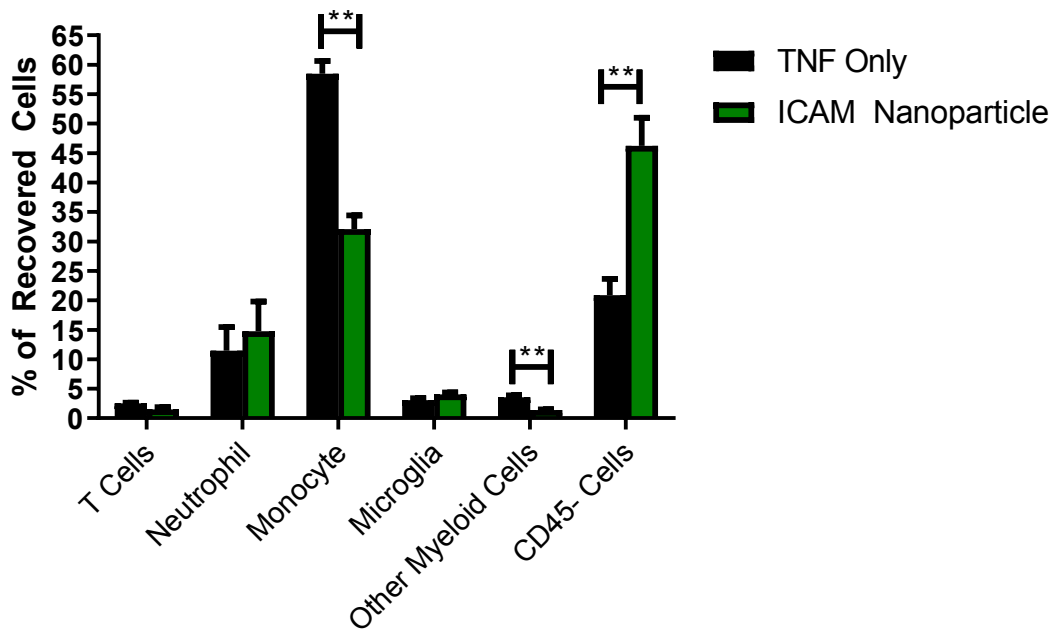

**Supplemental Figure 23.** Impact of ICAM-targeted polystyrene nanoparticles on immune cell infiltration into the brain, as measured by flow cytometry. N=3 mice/group. Comparisons made by unpaired t-test.

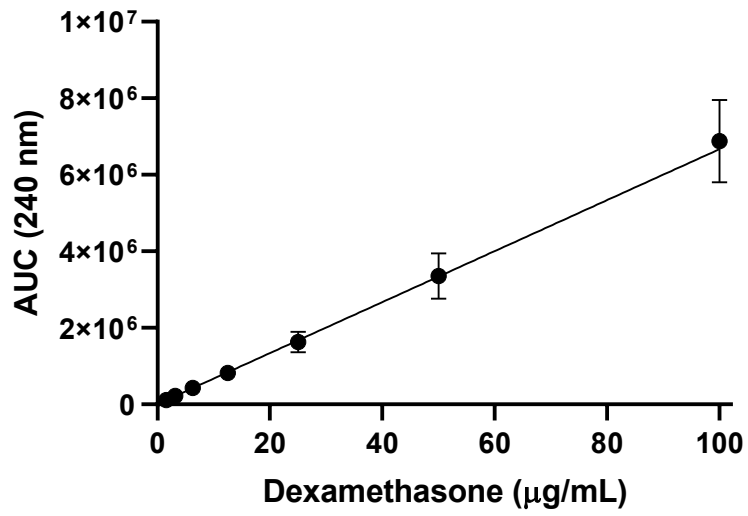

**Supplemental Figure 24.** Standard curve for dexamethasone HPLC assay. Linear range: 1.56 – 100 µg/mL. Data represents mean ± SD of 15 independently run standard curves.

| <b>αICAM</b> | Blood      | Lung        | Liver       | Kidney          | Heart       | Spleen      | Brain               |
|--------------|------------|-------------|-------------|-----------------|-------------|-------------|---------------------|
| Naïve        | 4.69±1.59  | 106±13      | 19.6±2.1    | 9.51±0.90       | 3.53±0.29   | 47.8±4.1    | 0.347±0.049         |
| 1 hour       | 6.04±0.21  | 216±8**     | 17.5±1.0    | 29.2±1.3**<br>* | 10.2±0.3*** | 24.3±2.4**  | 0.731±0.049         |
| 2 hours      | 7.23±0.22  | 258±16***   | 33.2±4.8**  | 19.3±0.8**<br>* | 6.40±0.61** | 44.5±4.2    | 0.655±0.162         |
| 3 hours      | 5.99±0.59  | 194±16**    | 18.7±0.6    | 31.0±1.3**<br>* | 11.9±0.5*** | 31.6±1.0*   | 0.882±0.028         |
| 6 hours      | 3.19±0.42  | 115±12      | 16.8±0.6    | 11.1±1.0        | 5.86±0.40*  | 22.7±1.8*** | 1.31±0.16**         |
| 24 hours     | 5.02±0.13  | 108±24      | 14.2±1.0    | 7.74±1.97       | 4.79±0.86   | 27.2±4.6**  | 2.43±0.24***        |
| <b>αCD45</b> |            |             |             |                 |             |             |                     |
| Naïve        | 12.7±0.7   | 13.2±2.2    | 27.8±2.8    | 5.01±0.13       | 1.77±0.22   | 189±16      | 0.034±0.005         |
| 2 hours      | 12.7±0.6   | 60.5±10.2** | 33.5±0.3    | 5.68±0.37       | 0.946±0.110 | 136±17      | 0.061±0.010         |
| 24 hours     | 12.6±0.6   | 35.9±7.3    | 27.4±1.2    | 7.30±0.70*      | 1.56±0.29   | 215±16      | 0.536±0.042***<br>* |
| <b>IgG</b>   |            |             |             |                 |             |             |                     |
| Naïve        | 30.4±0.9   | 0.931±0.526 | 3.69±0.52   | 4.29±0.98       | 1.28±0.17   | 2.36±0.01   | 0.077±0.022         |
| 1 hour       | 50.2±1.9** | 1.33±0.42   | 15.8±2.4*** | 11.7±2.2        | 1.26±0.25   | 9.75±0.51   | 0.073±0.007         |
| 2 hours      | 41.5±2.6   | 6.88±2.90*  | 11.2±1.3**  | 2.11±0.09       | 1.58±0.31   | 7.33±0.62   | 0.033±0.006         |
| 3 hours      | 49.0±0.5** | 6.30±1.31   | 16.2±1.0*** | 16.4±5.7*       | 1.26±0.16   | 9.90±1.85   | 0.074±0.025         |
| 6 hours      | 31.0±5.6   | 0.862±0.060 | 4.12±0.86   | 4.30±0.35       | 1.33±0.26   | 3.70±0.84   | 0.069±0.021         |
| 24 hours     | 43.2±2.1*  | 0.917±0.293 | 4.65±0.02   | 4.09±0.11       | 1.37±0.21   | 4.33±0.21   | 0.109±0.021         |

**Supplemental Table 1.** Biodistribution of αICAM, αCD45, and IgG injected at different times post-TNF-α injury. Values reported as percent of injected dose/g organ (%ID/g). Samples were collected 30 minutes after IV injection of mAb. Data reported as mean ± SEM. Comparisons made by 1-way ANOVA with Dunnett's post-hoc test vs. naïve. \* denotes p<0.05, \*\* denotes p<0.01, \*\*\* denotes p<0.001, \*\*\*\* denotes p<0.0001. N = 3/group.

| <b>αPECAM</b> | Blood      | Lung        | Liver      | Kidney      | Heart         | Spleen    | Brain          |
|---------------|------------|-------------|------------|-------------|---------------|-----------|----------------|
| 30 minutes    | 3.64±0.73  | 133±22      | 22.6±4.2   | 26.0±5.0    | 19.6±4.7      | 32.3±6.5  | 3.99±0.61      |
| 4 hours       | 2.91±0.44  | 143±16      | 26.0±4.9   | 30.7±4.3    | 22.4±4.5      | 37.2±9.1  | 3.42±0.47      |
| 22 hours      | 1.27±0.22  | 90.4±5.1    | 19.8±0.4   | 20.6±1.3    | 15.0±1.0      | 18.8±2.2  | 2.27±0.08      |
| <b>αICAM</b>  | Blood      | Lung        | Liver      | Kidney      | Heart         | Spleen    | Brain          |
| 30 minutes    | 9.08±0.29  | 223±28      | 23.1±2.6   | 30.4±2.0    | 11.2±1.4      | 38.1±9.4  | 0.605±0.053    |
| 4 hours       | 7.49±0.35  | 119±10      | 36.8±1.3   | 18.1±1.7    | 7.14±0.38     | 73.8±2.9  | 0.868±0.035    |
| 22 hours      | 2.77±0.37  | 59.3±6.2    | 16.2±0.8   | 7.25±0.32   | 3.26±0.20     | 29.3±0.4  | 2.52±0.14      |
| <b>αCD45</b>  | Blood      | Lung        | Liver      | Kidney      | Heart         | Spleen    | Brain          |
| 30 minutes    | 12.7 ± 0.6 | 60.5 ± 10.2 | 35.5 ± 1.7 | 5.68 ± 0.37 | 0.946 ± 0.110 | 136 ± 17  | 0.0610 ± 0.010 |
| 4 hours       | 2.22±0.18  | 8.45±0.69   | 23.8±3.7   | 2.00±0.49   | 0.243±0.023   | 153±36    | 0.146±0.040    |
| 22 hours      | 1.42±0.45  | 3.70±0.88   | 3.74±0.49  | 0.974±0.242 | 0.268±0.084   | 89.6±29.2 | 0.437±0.116    |
| <b>IgG</b>    | Blood      | Lung        | Liver      | Kidney      | Heart         | Spleen    | Brain          |
| 30 minutes    | 47.5±3.0   | 9.12±0.88   | 18.6±0.3   | 2.67±0.26   | 3.46±0.52     | 11.6±1.7  | 0.071±0.018    |
| 4 hours       | 45.4±1.9   | 4.80±0.73   | 6.49±0.90  | 3.88±0.28   | 2.86±0.11     | 8.49±0.36 | 0.114±0.017    |
| 22 hours      | 25.4±0.9   | 4.45±0.28   | 1.65±0.19  | 1.95±0.35   | 2.44±0.06     | 4.46±0.18 | 0.960±0.125    |

**Supplemental Table 2.** Pharmacokinetics and biodistribution of mAb against endothelial and leukocyte epitopes. Data represented as mean ± SEM. N = 3/group

| <b>αICAM</b> | Blood       | Lung        | Liver     | Kidney      | Heart       | Spleen    | Brain       |
|--------------|-------------|-------------|-----------|-------------|-------------|-----------|-------------|
| 30 minutes   | 1.91±0.14   | 147±1       | 25.9±0.5  | 2.78±0.20   | 0.578±0.110 | 21.4±4.4  | 0.051±0.005 |
| 4 hours      | 2.64±0.53   | 8.82±2.75   | 14.1±1.1  | 1.23±0.10   | 0.341±0.067 | 29.2±5.1  | 0.086±0.009 |
| 22 hours     | 3.65±1.02   | 20.2±5.9    | 8.86±0.94 | 2.14±0.49   | 0.726±0.288 | 25.1±2.6  | 0.254±0.029 |
| <b>IgG</b>   | Blood       | Lung        | Liver     | Kidney      | Heart       | Spleen    | Brain       |
| 30 minutes   | 0.545±0.066 | 2.83±0.51   | 64.7±1.8  | 0.282±0.025 | 0.062±0.017 | 102±7     | 0.008±0.005 |
| 4 hours      | 1.49±0.07   | 6.12±2.03   | 41.3±4.3  | 0.816±0.065 | 0.215±0.014 | 67.4±11.2 | 0.038±0.007 |
| 22 hours     | 0.499±0.081 | 0.222±0.037 | 16.2±1.0  | 0.273±0.055 | 0.053±0.006 | 16.6±2.7  | 0.028±0.007 |

**Supplemental Table 3.** Pharmacokinetics and biodistribution of ICAM-targeted and IgG polystyrene nanoparticles injected 2 hours after intrastriatal TNF-α. Experimental design as in **Figure 3a**. Values reported as percent of injected dose/g organ (%ID/g). Samples were collected 30 minutes after IV injection of polystyrene nanoparticles. Data reported as mean ± SEM. N = 3/group.

| <b>αICAM</b> | Blood       | Lung      | Liver    | Kidney      | Heart       | Spleen   | Brain       |
|--------------|-------------|-----------|----------|-------------|-------------|----------|-------------|
| 30 minutes   | 2.99±0.05   | 174±6     | 36.7±0.4 | 22.1±1.0    | 7.99±0.40   | 40.8±6.7 | 0.498±0.054 |
| 4 hours      | 4.65±0.25   | 131±9     | 30.4±1.1 | 18.3±1.9    | 6.79±0.39   | 38.6±6.3 | 0.702±0.085 |
| 22 hours     | 5.49±0.53   | 50.2±6.0  | 14.3±1.4 | 13.2±0.6    | 4.44±0.17   | 10.6±0.6 | 0.287±0.006 |
| <b>IgG</b>   | Blood       | Lung      | Liver    | Kidney      | Heart       | Spleen   | Brain       |
| 30 minutes   | 15.2±3.2    | 9.76±0.74 | 56.1±2.4 | 0.547±0.020 | 0.367±0.068 | 65.5±6.2 | 0.040±0.012 |
| 4 hours      | 1.92±0.26   | 1.52±0.15 | 46.9±1.5 | 1.47±0.11   | 0.101±0.010 | 49.9±2.5 | 0.023±0.003 |
| 22 hours     | 0.206±0.091 | 1.16±0.22 | 32.5±4.9 | 1.41±0.34   | 0.090±0.033 | 25.4±3.4 | 0.046±0.018 |

**Supplemental Table 4.** Pharmacokinetics and biodistribution of ICAM-targeted and IgG liposomes injected 2 hours after intrastriatal TNF- $\alpha$ . Experimental design as in **Figure 3a**. Values reported as percent of injected dose/g organ (%ID/g). Samples were collected 30 minutes after IV injection of liposomes. Data reported as mean  $\pm$  SEM. N = 3/group.

| <b>αICAM</b> | Blood     | Lung        | Liver     | Kidney    | Heart       | Spleen    | Brain         |
|--------------|-----------|-------------|-----------|-----------|-------------|-----------|---------------|
| 30 minutes   | 7.55±0.49 | 123±9       | 39.2±1.6  | 10.7±0.6  | 5.11±0.32   | 56.9±7.0  | 0.281±0.005   |
| 4 hours      | 14.7±0.9  | 53.2±1.4    | 22.1±0.7  | 9.89±0.65 | 2.52±0.25   | 24.2±3.4  | 0.313±0.019   |
| 22 hours     | 13.2±0.9  | 14.4±1.3    | 7.72±0.70 | 5.66±0.61 | 2.20±0.36   | 9.96±0.73 | 0.344±0.004   |
| <b>IgG</b>   | Blood     | Lung        | Liver     | Kidney    | Heart       | Spleen    | Brain         |
| 22 hours     | 5.31±0.98 | 0.738±0.243 | 1.73±0.20 | 1.81±0.46 | 0.373±0.053 | 6.81±0.21 | 0.0632±0.0459 |

**Supplemental Table 5.** Pharmacokinetics and biodistribution of ICAM-targeted and IgG lipid nanoparticles (LNP) injected 2 hours after intrastriatal TNF- $\alpha$ . Experimental design as in **Figure 3a**. Values reported as percent of injected dose/g organ (%ID/g). Samples were collected 30 minutes after IV injection of LNP. Data reported as mean  $\pm$  SEM. N = 3/group.

| <b>Surface Marker</b> | <b>Clone</b> | <b>Fluorophore</b> |
|-----------------------|--------------|--------------------|
| CD3 $\epsilon$        | 145-2C11     | PE                 |
| CD11b                 | M1/70        | V500               |
| CD45.2                | 104          | FITC               |
| Ly6G                  | 1A8          | PerCP-Cy5.5        |
| Ly6C                  | AL-21        | APC-Cy7            |
| iNOS                  | CXNFT        | APC                |
| Arginase 1            | A1exF5       | PE                 |

**Supplemental Table 6.** Antibodies used for flow cytometry

| <b>Surface Marker</b> | <b>Working concentration</b> | <b>Manufacturer</b> |
|-----------------------|------------------------------|---------------------|
| CD68                  | 10 $\mu$ g/ml                | Bio-Rad             |
| VCAM (MK2.7)          | 5 $\mu$ g/ml                 | In house production |

**Supplemental Table 7.** Antibodies used for histology
